# Supplementary material for: Clinical, Biochemical, and Radiological Characteristics of a Single-Center Retrospective Cohort of 705 Large Adrenal Tumors
Source: PubMed Central journal article supplement — Mayo Clin Proc Innov Qual Outcomes. 2017 Dec 21;2(1):30–9. doi: 10.1016/j.mayocpiqo.2017.11.002 (PMC6124341; doi:10.1016/j.mayocpiqo.2017.11.002), 2017-12-21
Supplement: mmc1.pdf [file mmc1.pdf]

**Supplemental eTable 1. Clinical presentation and final pathology in patients with incidental versus non-incidental mode of adrenal tumor discovery<sup>a</sup>**

| <b>Variable</b>              | <b>Incidentalomas</b> | <b>Non-incidentalomas</b> | <b>P value</b>  |
|------------------------------|-----------------------|---------------------------|-----------------|
| <b>N, %</b>                  | 472 (67%)             | 233 (33%)                 |                 |
| <b>Sex</b>                   | 249 (53%)             | 124 (53%)                 | 0.90            |
| Female, n (%)                |                       |                           |                 |
| <b>Age at diagnosis</b>      | 60 (19-88)            | 54 (18-91)                | <b>&lt;.001</b> |
| years, median (range)        |                       |                           |                 |
| <b>Adrenal mass diameter</b> | 5 (4-20)              | 6 (4-24.4)                | <b>&lt;.001</b> |
| cm, median (range)           |                       |                           |                 |
| <b>Diagnosis n (%)</b>       |                       |                           |                 |
| Adrenocortical Adenoma (ACA) | 184 (39%)             | 32 (14%)                  | <b>&lt;.001</b> |
| Other benign                 | 104 (22%)             | 12 (5%)                   |                 |
| Pheochromocytoma             | 86 (18%)              | 72 (31%)                  |                 |

|                                |          |          |  |
|--------------------------------|----------|----------|--|
| Other malignant                | 61 (13%) | 66 (28%) |  |
| Adrenocortical carcinoma (ACC) | 37 (8%)  | 51 (22%) |  |

<sup>a</sup>Range was defined as minimum to maximum value.

**Supplemental eTable 2. Clinical presentation of patients with adrenal tumors based on tumor size cutoff of 6 cm<sup>a</sup>**

|                                  | <b>Tumor size ≤ 6 cm</b> | <b>Tumor size &gt; 6cm</b> | <b>P value</b>  |
|----------------------------------|--------------------------|----------------------------|-----------------|
| <b>N, %</b>                      | 449 (64%)                | 256 (36%)                  |                 |
| <b>Sex</b>                       | 234 (52%)                | 139 (54%)                  | 0.60            |
| Female, n (%)                    |                          |                            |                 |
| <b>Age at diagnosis</b>          | 60 (18-91)               | 56 (19-87)                 | <b>&lt;.001</b> |
| years, median (range)            |                          |                            |                 |
| <b>Mode of discovery (n (%))</b> |                          |                            |                 |
| Incidental                       | 326 (73%)                | 145 (57%)                  | <b>&lt;.001</b> |
| Hormone excess                   | 62 (14%)                 | 46 (18%)                   |                 |
| Cancer staging                   | 43 (10%)                 | 18 (7%)                    |                 |
| Other <sup>b</sup>               | 18 (4%)                  | 47 (18%)                   |                 |
| <b>Adrenalectomy</b>             | 274 (61%)                | 183 (72%)                  | <b>.005</b>     |
| yes, n (%)                       |                          |                            |                 |

|                         |           |          |                 |
|-------------------------|-----------|----------|-----------------|
| <b>Diagnosis, n (%)</b> |           |          |                 |
| Adenoma                 | 194 (43%) | 24 (9%)  | <b>&lt;.001</b> |
| Pheochromocytoma        | 112 (25%) | 46 (18%) |                 |
| Other malignant         | 76 (17%)  | 52 (20%) |                 |
| Other benign            | 53 (12%)  | 60 (23%) |                 |
| ACC                     | 14 (3%)   | 74 (29%) |                 |
| <b>Bilateral</b>        | 74 (16%)  | 30 (12%) | <b>.08</b>      |
| n (%)                   |           |          |                 |

<sup>a</sup>Range was defined as minimum to maximum value

<sup>b</sup>Other: mass effect and B symptoms

Abbreviations used: ACC, adrenocortical carcinoma;
